# Supplementary material
Source: Springer Nature journal article supplement (https://www.springermedizin.de/resource/supplementary/12936_2012_2561_MOESM11_ESM.pdf/9543182)

**A**

| NN-Sum | D-Score   | HMM probability | Minimal Mixed groups count |
|--------|-----------|-----------------|----------------------------|
| 1      | 0.40-1.00 | 0.70-0.90       | 1104                       |
| 2      | 0.45      | 0.65            | 558                        |
| 3      | 0.45      | 0.85;0.90       | 489                        |
| 4      | 0.45      | 0.90            | <b>476</b>                 |

**B**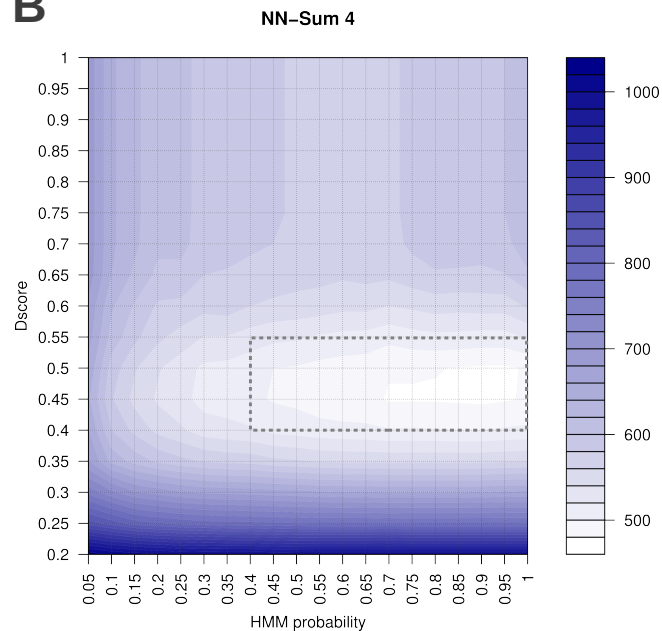**C**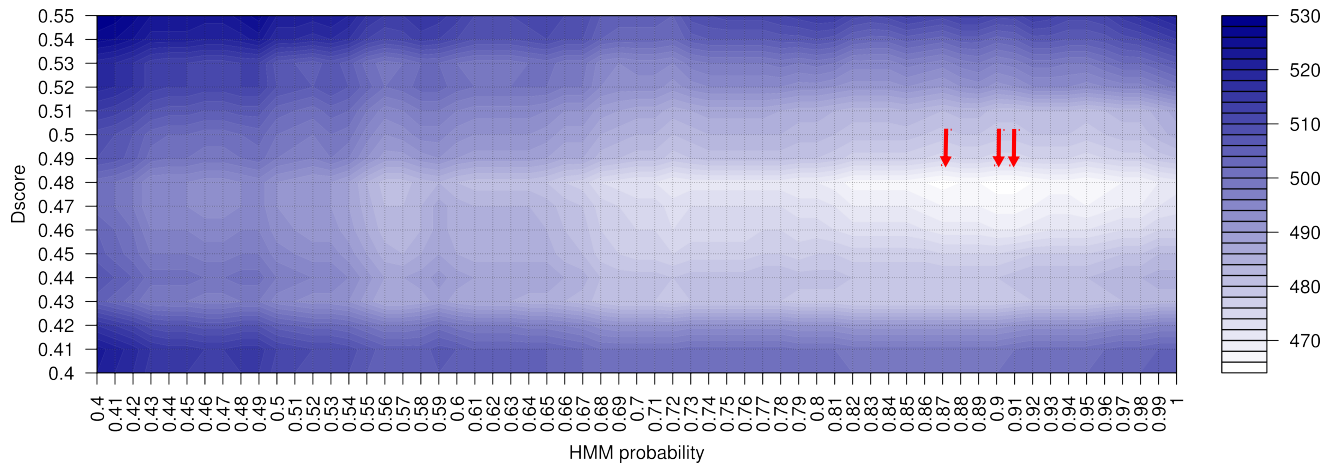

Supplement: MOESM11 [file 9543182]
